# Supplementary material for: Differential Contribution of N- and C-Terminal Regions of HIF1α and HIF2α to Their Target Gene Selectivity
Source: PubMed Central journal article supplement (PMC7764359; doi:10.3390/ijms21249401), 2020-12-10
Supplement: ijms-21-09401-s001.pdf [file ijms-21-09401-s001.pdf]

## Differential Contribution of N- and C-Terminal Regions of HIF1 $\alpha$ and HIF2 $\alpha$ to Their Target Gene Selectivity

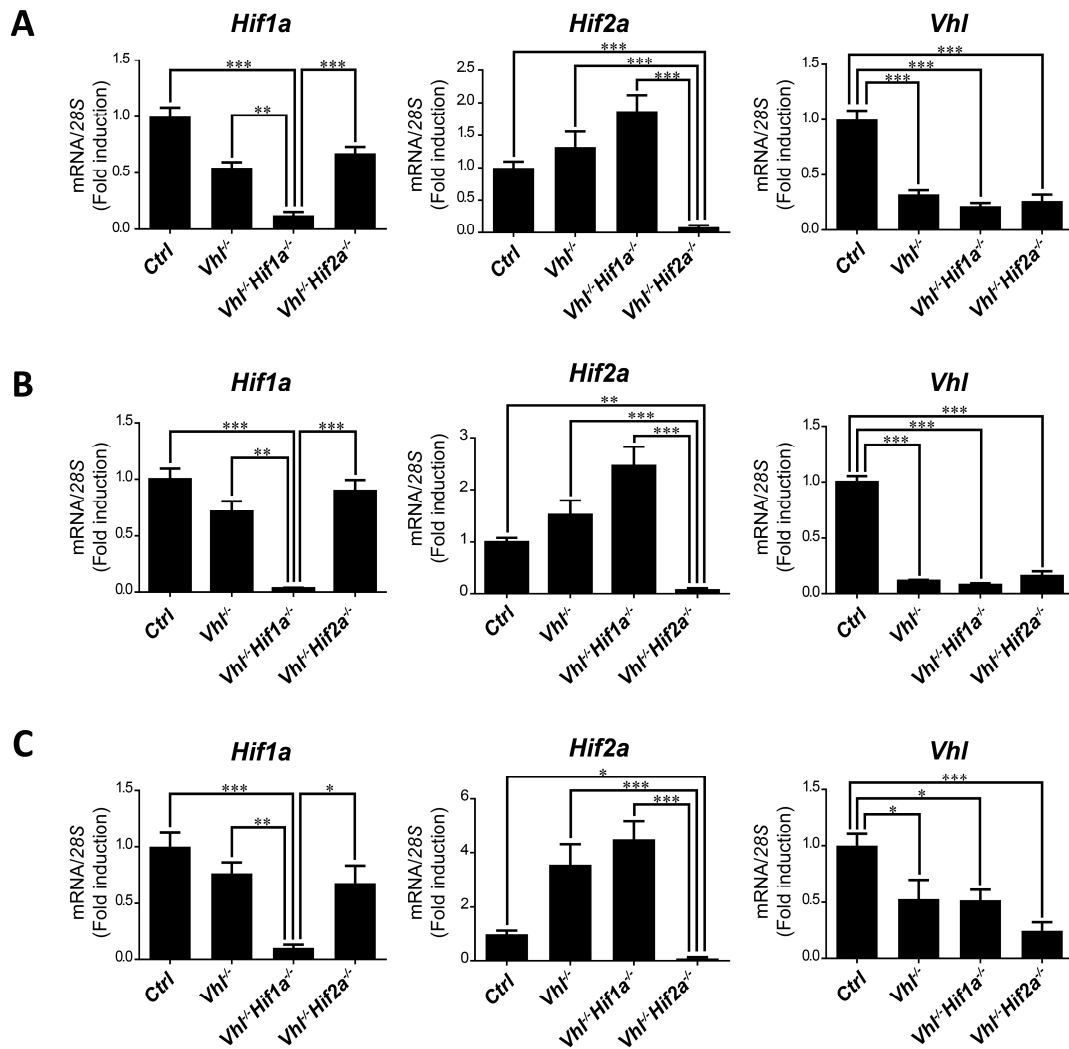

**Figure S1.** *Vhl*, *Hif1a* and *Hif2a* gene expression in *Vhl*<sup>-/-</sup>, *Vhl*<sup>-/-</sup>*Hif1a*<sup>-/-</sup> and *Vhl*<sup>-/-</sup>*Hif2a*<sup>-/-</sup> mice. Relative *Hif1a*, *Hif2a* and *Vhl* expression in the liver (A), kidney (B) and lung (C) of *Vhl*<sup>-/-</sup> mice ( $n = 4-14$ ), *Vhl*<sup>-/-</sup>*Hif1a*<sup>-/-</sup> mice ( $n = 3-7$ ), *Vhl*<sup>-/-</sup>*Hif2a*<sup>-/-</sup> mice ( $n = 5-12$ ) and the corresponding controls ( $n = 5-18$ ). Data are shown as mean  $\pm$  SEM. Statistical analysis was performed using one-way ANOVA followed by Tukey's post hoc test. \*  $p < 0.05$ , \*\*  $p < 0.01$ , and \*\*\*  $p < 0.001$ .

**Table S1.** List of human and mouse primers sequences used in the present study.

| <b>HUMAN</b> |         |                                  |
|--------------|---------|----------------------------------|
| 28S          | Forward | 5'-GGTAGCCAAATGCCTCGTCAT-3'      |
|              | Reverse | 5'-GGATAGTAGGTAGGGACAGTGGGAAT-3' |
| BNIP3        | Forward | 5'-TCAAGTCGGCCGAAAATAT-3'        |
|              | Reverse | 5'-GCGCTTCGGGTGTTTAAAGA-3'       |
| CAIX         | Forward | 5'-GGGCCCCGAAGAAAACAGT-3'        |
|              | Reverse | 5'-GACCTGAGTCTCTGAGCCTTCCT-3'    |
| PGM1         | Forward | 5'-AGCATTCCGTATTTCCAGCAG-3'      |
|              | Reverse | 5'-GCCAGTTGGGGTCTCATACAAA-3'     |
| PHD3         | Forward | 5'-GCCGGCTGGGCAAATACTA-3'        |
|              | Reverse | 5'-CCGGATAGCAAGCCACCAT-3'        |
| SLC7A5       | Forward | 5'-GGAACATTGTGCTGGCATTATACA-3'   |
|              | Reverse | 5'-CCTCTGTGACGAAATTCAAGTAATTC-3' |
| CCND1        | Forward | 5'-CTGTGCATCTACACCGACAACCTC-3'   |
|              | Reverse | 5'-AGGTTCCACTTGAGCTTGTTAC-3'     |
| GLUT1        | Forward | 5'-TCAACCGCAACGAGGAGAA-3'        |
|              | Reverse | 5'-CTGTCCC GCGCAGCTT-3'          |
| TGFA         | Forward | 5'-CACTCAGTTCTGCTTCCATGGA-3'     |
|              | Reverse | 5'-CGTACCCAGAATGGCAG-3'          |
| OCT-4        | Forward | 5'-GCTTAGCTTCAAGAACATGTGTA-3'    |
|              | Reverse | 5'-CTCTCACTCGGTTCTCGAT-3'        |
| NDRG1        | Forward | 5'-CGGCAACCTGCACCTGTT-3'         |
|              | Reverse | 5'-TGTGGGTTCCCGGCATT-3'          |
| <b>MOUSE</b> |         |                                  |
| Vhl          | Forward | 5'-ATCCCTGAAGAGCCAAAGATGA-3'     |
|              | Reverse | 5'-TCGACGTTCAGAACTCATCTTTTT-3'   |
| Hif1a        | Forward | 5'-CACCGATTCGCCATGGA-3'          |
|              | Reverse | 5'-TCGACGTTCAGAACTCATCTTTTT-3'   |
| Hif2a        | Forward | 5'-CCTGGCCATCAGCTTCCTT-3'        |
|              | Reverse | 5'-GGTCGGCCTCAGCTTCAG-3'         |
| Phd3         | Forward | 5'-TGGACAACCCCAATGGTGAT-3'       |
|              | Reverse | 5'-GCAGGACCCCTCCATGTAAC-3'       |
| Ndr1         | Forward | 5'-TGGAGTCCTTACCAGTTTGG-3'       |
|              | Reverse | 5'-CGAAGCGGGTCAGGATGTAG-3'       |
| Slc7a5       | Forward | 5'-TTCGCCACCTACTTGCTCAA-3'       |
|              | Reverse | 5'-CCTTTACGCTGTAGCAGTTC-3'       |
| Glut1        | Forward | 5'-TCGTGCTTGGCATCCTTATTG-3'      |
|              | Reverse | 5'-GAGCAGCAGAGGCCACAAGT-3'       |
| Pgm1         | Forward | 5'-CGAGAAGGACGTTGCCAAGA-3'       |
|              | Reverse | 5'-GGGACACTTTCAGAGCAATGG-3'      |
| Tgfa         | Forward | 5'-GGCTCTGGAGAACAGCACATC-3'      |
|              | Reverse | 5'-GGAATCTGGGCACTTGTTGAA-3'      |
| Epo          | Forward | 5'-CAAAGTCAACTTCTATGCTTGGAAA-3'  |
|              | Reverse | 5'-CAGGCCTTGCCAAACTTCTATG-3'     |
| CaIX         | Forward | 5'-GCGCTAAGCAGCTCCATACTC-3'      |
|              | Reverse | 5'-CGTGGCTCGGAAGTTCAGTT-3'       |
